# Supplementary figures and images for: Notch Signaling Modulates Hypoxia-Induced Neuroendocrine Differentiation of Human Prostate Cancer Cells
Source: Oxford University Press journal article supplement (doi:10.1158/1541-7786.mcr-11-0296), 2011-12-15

**A.**

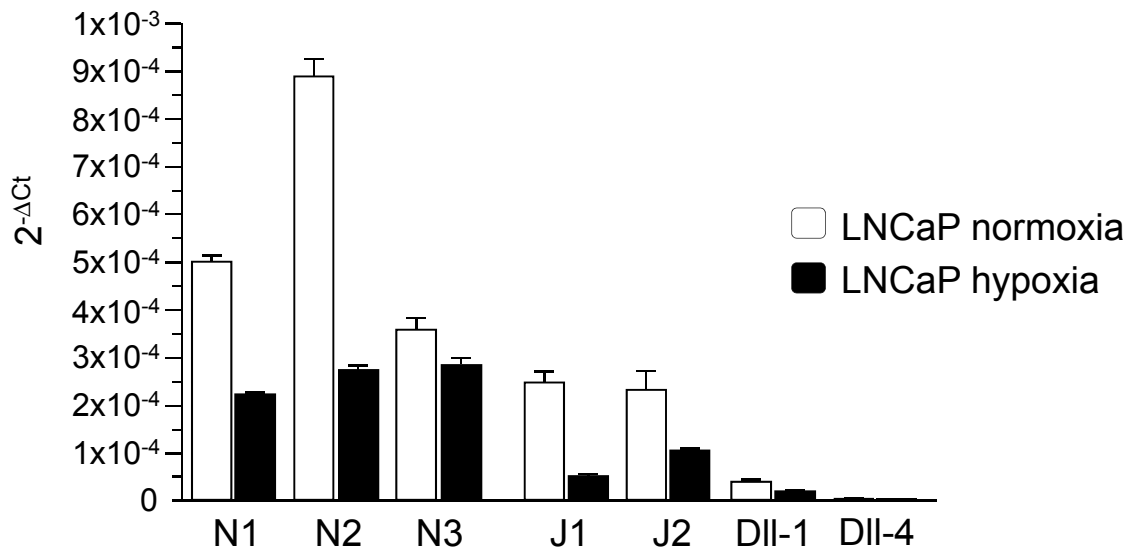

**B.**

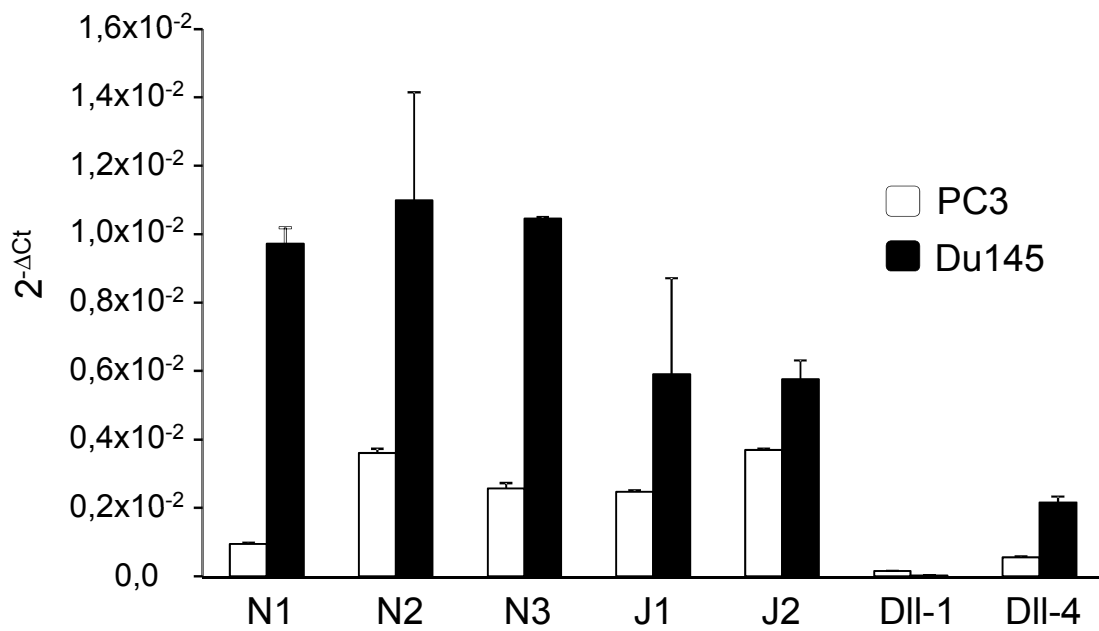

Supplementary Figure 1

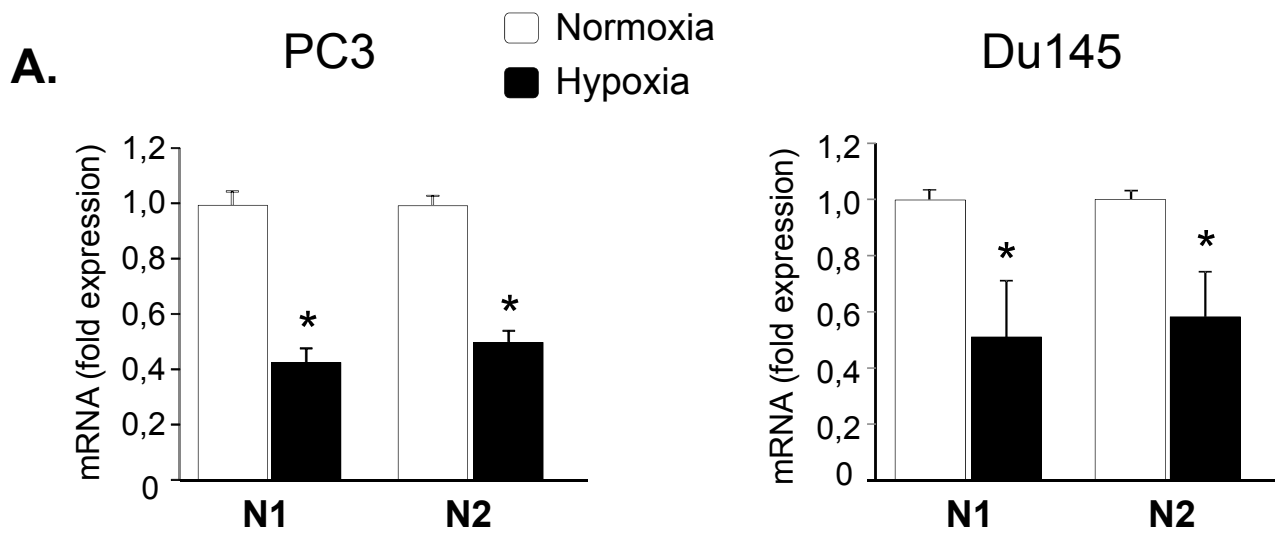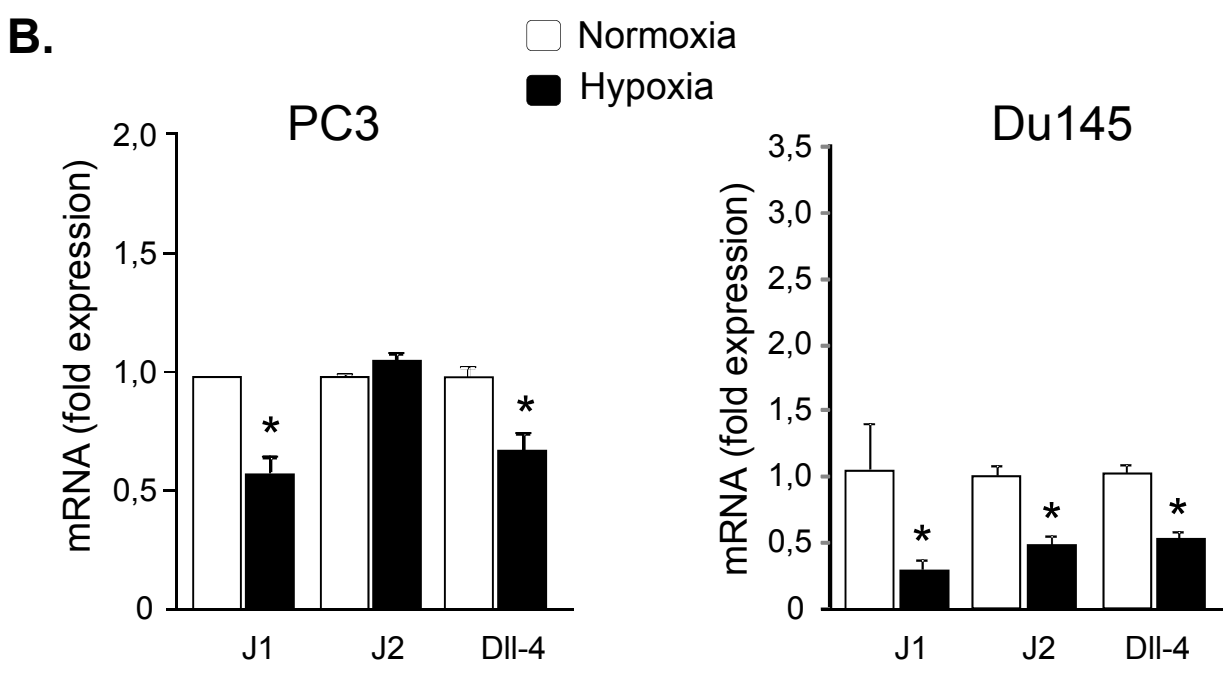

Supplementary Figure 2

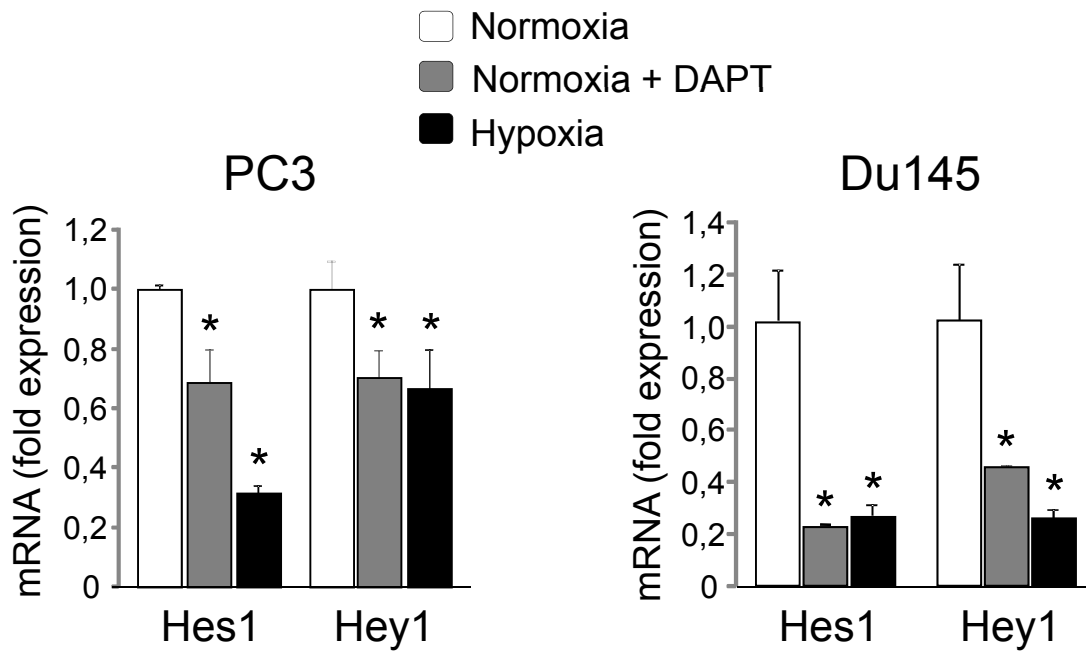

Supplementary Figure 3

Supplement: 15417786mcr110296-sup-mcr_11-0296_f1-3_67k.pdf [file 15417786mcr110296-sup-mcr_11-0296_f1-3_67k.pdf]
